# Supplementary material
Source: PubMed Central journal article supplement (PMC2710828)

**Supplementary Figure 1.** TRAF4 MOa does not affect early mesoderm. Quantitative RT-PCR shows mesodermal gene expression in stage 10.5 (mid-gastrula) and stage 13 (late gastrula) (A) dorsal marginal zone (DMZ) and (B) ventral marginal zone (VMZ) explants isolated from embryos injected with TRAF4a morpholino at 4-cell stage (20ng/cell). Y-axes show the expression levels of genes in arbitrary units, where the expression level of genes in control marginal zone explants are set to 1. Injection of TRAF4a morpholino does not significantly affect expression of mesoderm markers in DMZ(A) and VMZ (B) explants.

**Supplementary Figure 2.** TRAF4 has little to no effect on responses to eFGF and Wnt8 ligands, respectively, in animal cap mesoderm induction assays.

## Supplementary Figure 1

A

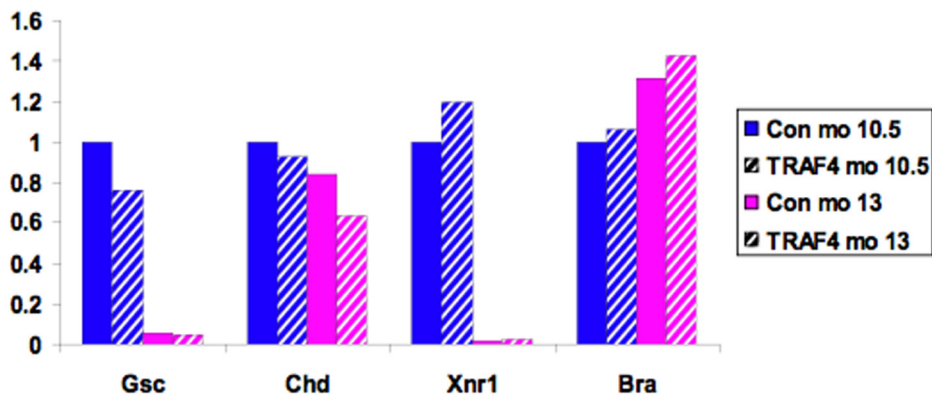

B

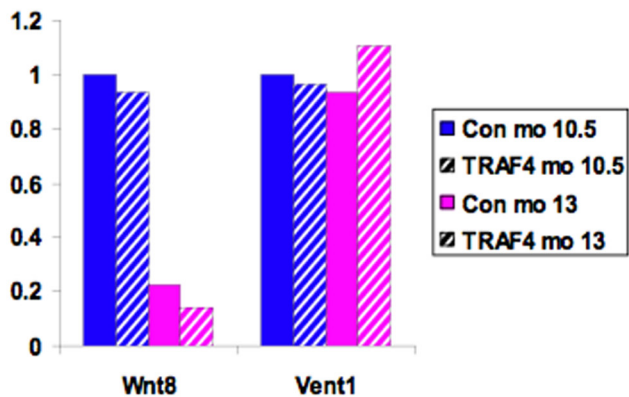

## Supplementary Figure 2

**A**

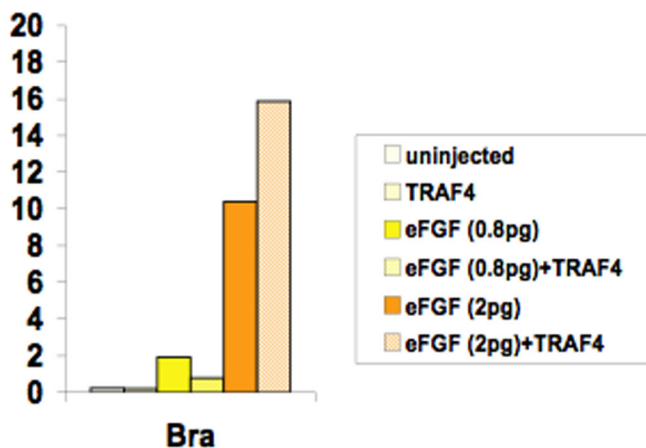

**B**

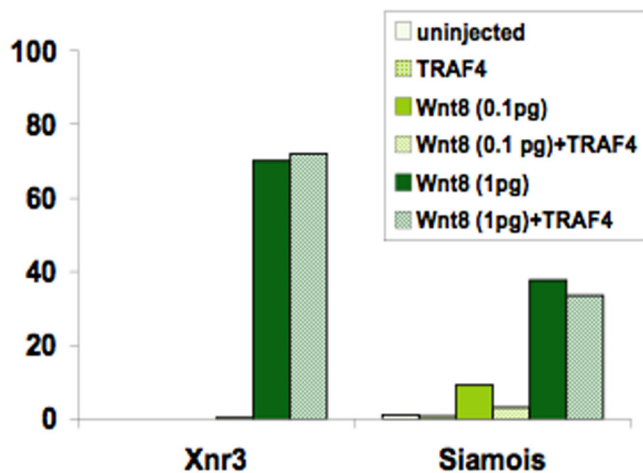

Supplement: E08-03-0325_1.pdf [file E08-03-0325_1.pdf]
